# Supplementary material for: A significant therapeutic effect of silymarin administered alone, or in combination with chemotherapy, in experimental pulmonary tuberculosis caused by drug-sensitive or drug-resistant strains: In vitro and in vivo studies
Source: PubMed Central journal article supplement (PMC6542514; doi:10.1371/journal.pone.0217457), 2019-05-30
Supplement: pone.0217457.s001.pdf [file pone.0217457.s001.pdf]

**S1 Table. Data to determinate cell viability in noninfected human macrophages and stimulated with the indicated concentrations of silymarin (Sm) or silibinin (Sb)**

| Sm   |             |     |     |            |     |     |             |     |    |             |    |    |             |    |    |             |    | Average of the% for Sm $\mu$ M |     |      |      |      |      |      |
|------|-------------|-----|-----|------------|-----|-----|-------------|-----|----|-------------|----|----|-------------|----|----|-------------|----|--------------------------------|-----|------|------|------|------|------|
| Time | Non treated |     |     | 50 $\mu$ M |     |     | 100 $\mu$ M |     |    | 150 $\mu$ M |    |    | 200 $\mu$ M |    |    | 250 $\mu$ M |    |                                | 0   | 50   | 100  | 150  | 200  | 250  |
| 0    | 100         | 100 | 100 | 88         | 102 | 94  | 77          | 84  | 80 | 73          | 82 | 80 | 72          | 77 | 77 | 64          | 67 | 67                             | 100 | 94.9 | 80.3 | 78.3 | 75.2 | 66.1 |
| 3    | 100         | 100 | 100 | 98         | 89  | 96  | 79          | 74  | 76 | 73          | 73 | 72 | 69          | 58 | 63 | 56          | 48 | 55                             | 100 | 94.2 | 76.2 | 72.8 | 63.6 | 53.1 |
| 6    | 100         | 100 | 100 | 77         | 118 | 93  | 64          | 101 | 82 | 61          | 88 | 70 | 47          | 73 | 59 | 44          | 70 | 56                             | 100 | 95.8 | 82.6 | 72.9 | 59.8 | 56.7 |
| 12   | 100         | 100 | 100 | 87         | 103 | 94  | 64          | 80  | 80 | 62          | 71 | 64 | 47          | 56 | 52 | 36          | 41 | 38                             | 100 | 94.7 | 74.6 | 65.5 | 51.4 | 38.3 |
| 24   | 100         | 100 | 100 | 98         | 90  | 101 | 79          | 73  | 79 | 64          | 57 | 65 | 21          | 18 | 21 | 19          | 17 | 18                             | 100 | 96.2 | 77.2 | 62.2 | 20.1 | 18   |
| 48   | 100         | 100 | 100 | 89         | 90  | 91  | 69          | 69  | 69 | 36          | 38 | 37 | 23          | 22 | 22 | 12          | 14 | 13                             | 100 | 90.1 | 69.1 | 37.1 | 22.5 | 13.1 |

| Sb   |             |     |     |            |    |    |             |    |    |             |    |    |             |    |    |             |    | Average of the % for Sb $\mu$ M |     |      |      |      |      |      |
|------|-------------|-----|-----|------------|----|----|-------------|----|----|-------------|----|----|-------------|----|----|-------------|----|---------------------------------|-----|------|------|------|------|------|
| Time | Non treated |     |     | 50 $\mu$ M |    |    | 100 $\mu$ M |    |    | 150 $\mu$ M |    |    | 200 $\mu$ M |    |    | 250 $\mu$ M |    |                                 | 0   | 50   | 100  | 150  | 200  | 250  |
| 0    | 100         | 100 | 100 | 105        | 86 | 95 | 98          | 83 | 88 | 89          | 82 | 89 | 69          | 76 | 73 | 70          | 78 | 74                              | 100 | 95.4 | 89.8 | 86.7 | 72.6 | 74.1 |
| 3    | 100         | 100 | 100 | 91         | 89 | 90 | 91          | 95 | 79 | 83          | 84 | 81 | 50          | 90 | 68 | 62          | 63 | 62                              | 100 | 89.9 | 88.5 | 82.5 | 69.4 | 62.4 |
| 6    | 100         | 100 | 100 | 88         | 85 | 96 | 87          | 79 | 85 | 85          | 75 | 78 | 55          | 53 | 58 | 53          | 49 | 57                              | 100 | 90   | 83.6 | 79.3 | 55.2 | 52.7 |
| 12   | 100         | 100 | 100 | 91         | 82 | 98 | 81          | 72 | 92 | 82          | 70 | 81 | 62          | 56 | 71 | 54          | 50 | 62                              | 100 | 90.4 | 81.9 | 77.8 | 63   | 55.3 |
| 24   | 100         | 100 | 100 | 88         | 84 | 87 | 81          | 76 | 79 | 73          | 69 | 70 | 65          | 66 | 65 | 25          | 27 | 27                              | 100 | 86.3 | 78.8 | 70.5 | 65.1 | 26.3 |
| 48   | 100         | 100 | 100 | 84         | 80 | 91 | 72          | 71 | 80 | 69          | 68 | 75 | 49          | 48 | 55 | 23          | 17 | 24                              | 100 | 85.1 | 74.2 | 70.6 | 50.6 | 21.1 |

**Data to determinate production of cytokines in noninfected human macrophages and stimulated with the indicated concentrations of silymarin (Sm) or silibinin (Sb)**

|    | NF-kB |      |       |        |       |        | IFN- $\gamma$ |      |       |        |       |        | TNF $\alpha$ |      |       |        |       |        | IL-12 |      |       |        |       |        |
|----|-------|------|-------|--------|-------|--------|---------------|------|-------|--------|-------|--------|--------------|------|-------|--------|-------|--------|-------|------|-------|--------|-------|--------|
|    | RPMI  | DMSO | SM 50 | SM 100 | SB 50 | SB 100 | RPMI          | DMSO | SM 50 | SM 100 | SB 50 | SB 100 | RPMI         | DMSO | SM 50 | SM 100 | SB 50 | SB 100 | RPMI  | DMSO | SM 50 | SM 100 | SB 50 | SB 100 |
| S1 | 2.2   | 7.6  | 20    | 12     | 15    | 17     | 1.1           | 4    | 6.9   | 21     | 11    | 22     | 1            | 3.4  | 6.2   | 21     | 13    | 26     | 3.1   | 6.4  | 16    | 16     | 19    | 21     |
| S2 | 2.4   | 4.9  | 40    | 53     | 26    | 8.3    | 6.2           | 9.7  | 47    | 41     | 47    | 16     | 7            | 11   | 59    | 59     | 57    | 18     | 3.1   | 5.5  | 28    | 23     | 5.4   | 19     |
| S3 | 8.1   | 7.7  | 13    | 37     | 27    | 31     | 10            | 16   | 24    | 31     | 37    | 24     | 14           | 20   | 26    | 45     | 46    | 25     | 8.5   | 11   | 44    | 34     | 6.8   | 21     |
| S4 | 4.4   | 11   | 25    | 21     | 24    | 29     | 9.6           | 4.4  | 73    | 64     | 62    | 60     | 10           | 9.4  | 24    | 29     | 45    | 51     | 3.7   | 14   | 22    | 15     | 29    | 11     |
