# Supplementary material for: A significant therapeutic effect of silymarin administered alone, or in combination with chemotherapy, in experimental pulmonary tuberculosis caused by drug-sensitive or drug-resistant strains: In vitro and in vivo studies
Source: PubMed Central journal article supplement (PMC6542514; doi:10.1371/journal.pone.0217457), 2019-05-30
Supplement: pone.0217457.s002.pdf [file pone.0217457.s002.pdf]

S2 Table. Data to determinate in vitro antimycobacterial activity of silymarin (Sm) and silibinin (Sb) tested by MIC assay and confirmed by quantification of colony forming units (CFU).

| <b>H37Rv</b> |                        |       |        |       |      |      |                        |        |       |       |       |       |           |           |
|--------------|------------------------|-------|--------|-------|------|------|------------------------|--------|-------|-------|-------|-------|-----------|-----------|
| - C          | 0.288                  | 0.283 | 0.255  | 0.259 | 0.29 | 0.3  | 0.2792                 |        |       |       |       |       |           |           |
| + C          | 2.565                  | 2.374 | 2.367  | 2.683 | 2.57 | 2.26 | 2.4693                 |        |       |       |       |       |           |           |
| INH          | 0.093                  | 0.195 | 0.163  | 0.173 | 0.13 | 0.2  | 0.1597                 |        |       |       |       |       |           |           |
|              | <b>Sm treated (OD)</b> |       |        |       |      |      | <b>Sb treated (OD)</b> |        |       |       |       |       | <b>Sm</b> | <b>Sb</b> |
| 800          | 0.097                  | 0.137 | 0.0795 | 0.102 | 0.13 | 0.12 | 0.314                  | 0.321  | 0.332 | 0.304 | 0.341 | 0.317 | 0.11      | 0.322     |
| 400          | 0.172                  | 0.164 | 0.1959 | 0.191 | 0.18 | 0.2  | 0.413                  | 0.342  | 0.293 | 0.419 | 0.418 | 0.509 | 0.184     | 0.399     |
| 200          | 0.213                  | 0.192 | 0.243  | 0.219 | 0.29 | 0.2  | 0.461                  | 0.488  | 0.421 | 0.546 | 0.526 | 0.502 | 0.226     | 0.491     |
| 100          | 0.315                  | 0.317 | 0.29   | 0.305 | 0.29 | 0.27 | 0.424                  | 0.51   | 0.51  | 0.469 | 0.529 | 0.507 | 0.297     | 0.492     |
| 50           | 0.342                  | 0.36  | 0.331  | 0.386 | 0.4  | 0.31 | 0.959                  | 0.903  | 0.969 | 1.113 | 1.052 | 1.124 | 0.355     | 1.02      |
| 25           | 0.362                  | 0.353 | 0.344  | 0.386 | 0.4  | 0.4  | 1.644                  | 1.7226 | 1.807 | 1.64  | 1.84  | 1.781 | 0.374     | 1.739     |
| 12.5         | 0.677                  | 0.452 | 0.569  | 0.62  | 0.78 | 0.69 | 1.683                  | 1.652  | 1.663 | 1.732 | 2.2   | 2.022 | 0.632     | 1.825     |
| 6            | 1.682                  | 1.493 | 1.582  | 1.36  | 1.79 | 1.73 | 2.466                  | 2.226  | 2.682 | 2.366 | 2.016 | 2.182 | 1.606     | 2.323     |

  

| <b>MDR</b> |                        |       |       |       |      |       |                        |       |       |       |       |       |           |           |
|------------|------------------------|-------|-------|-------|------|-------|------------------------|-------|-------|-------|-------|-------|-----------|-----------|
| - C        | 0.185                  | 0.193 | 0.192 | 0.199 | 0.21 | 0.206 |                        |       |       |       |       |       |           |           |
| + C        | 2.413                  | 2.26  | 2.472 | 2.876 | 2.57 | 2.062 |                        |       |       |       |       |       |           |           |
|            | <b>Sm treated (OD)</b> |       |       |       |      |       | <b>Sb treated (OD)</b> |       |       |       |       |       | <b>Sm</b> | <b>Sb</b> |
| 800        | 0.071                  | 0.045 | 0.059 | 0.063 | 0.08 | 0.043 | 0.71                   | 0.771 | 0.594 | 0.754 | 0.683 | 0.605 | 0.059     | 0.686     |
| 400        | 0.127                  | 0.132 | 0.151 | 0.159 | 0.14 | 0.134 | 0.897                  | 0.771 | 0.625 | 0.867 | 0.892 | 0.855 | 0.141     | 0.818     |
| 200        | 0.235                  | 0.211 | 0.208 | 0.399 | 0.36 | 0.397 | 1.13                   | 0.804 | 0.876 | 0.895 | 0.817 | 0.891 | 0.302     | 0.902     |
| 100        | 0.305                  | 0.297 | 0.302 | 0.268 | 0.29 | 0.313 | 0.963                  | 1.068 | 0.953 | 0.981 | 1.051 | 1.017 | 0.296     | 1.006     |
| 50         | 0.318                  | 0.456 | 0.327 | 0.591 | 0.45 | 0.551 | 0.946                  | 0.908 | 1.006 | 1.013 | 1.101 | 0.923 | 0.448     | 0.983     |
| 25         | 1.031                  | 0.987 | 1.004 | 1.116 | 1.16 | 0.908 | 1.106                  | 1.135 | 1.131 | 1.172 | 1.013 | 1.039 | 1.034     | 1.099     |
| 12.5       | 1.091                  | 1.123 | 1.12  | 1.106 | 1.24 | 1.22  | 1.062                  | 1.086 | 1.079 | 1.024 | 1.041 | 1.143 | 1.15      | 1.073     |
| 6          | 1.484                  | 1.153 | 1.242 | 1.618 | 1.47 | 1.413 | 2.39                   | 2.24  | 2.41  | 2.56  | 2.49  | 2.69  | 1.397     | 2.463     |

### H37Rv CFU determination

|      | Sm ( $\mu\text{M}$ ) |       | Mean   | SD     | Sb ( $\mu\text{M}$ ) |      | Mean  | SD      |
|------|----------------------|-------|--------|--------|----------------------|------|-------|---------|
| 0    | 1.22                 | 0.96  | 1.09   | 0.1838 | 1.22                 | 0.96 | 1.09  | 0.18385 |
| 12.5 | 0.68                 | 0.71  | 0.695  | 0.0212 | 0.8                  | 0.81 | 0.805 | 0.00707 |
| 25   | 0.54                 | 0.59  | 0.565  | 0.0354 | 0.7                  | 0.74 | 0.72  | 0.02828 |
| 50   | 0.44                 | 0.38  | 0.41   | 0.0424 | 0.63                 | 0.65 | 0.64  | 0.01414 |
| 100  | 0.38                 | 0.32  | 0.35   | 0.0424 | 0.51                 | 0.53 | 0.52  | 0.01414 |
| 200  | 0.24                 | 0.25  | 0.245  | 0.0071 | 0.49                 | 0.5  | 0.495 | 0.00707 |
| 400  | 0.018                | 0.017 | 0.0175 | 0.0007 | 0.47                 | 0.46 | 0.465 | 0.00707 |

### MDR CFU determination

|      | Sm ( $\mu\text{M}$ ) |       | Mean   | SD     | Sb ( $\mu\text{M}$ ) |      | Mean  | SD      |
|------|----------------------|-------|--------|--------|----------------------|------|-------|---------|
| 0    | 0.98                 | 1.21  | 1.095  | 0.1626 | 0.92                 | 1.01 | 0.965 | 0.06364 |
| 12.5 | 0.52                 | 0.61  | 0.565  | 0.0636 | 0.99                 | 0.91 | 0.95  | 0.05657 |
| 25   | 0.38                 | 0.45  | 0.415  | 0.0495 | 0.96                 | 0.9  | 0.93  | 0.04243 |
| 50   | 0.32                 | 0.38  | 0.35   | 0.0424 | 0.83                 | 0.89 | 0.86  | 0.04243 |
| 100  | 0.24                 | 0.32  | 0.28   | 0.0566 | 0.85                 | 0.79 | 0.82  | 0.04243 |
| 200  | 0.24                 | 0.26  | 0.25   | 0.0141 | 0.68                 | 0.59 | 0.635 | 0.06364 |
| 400  | 0.014                | 0.021 | 0.0175 | 0.0049 | 0.5                  | 0.67 | 0.585 | 0.12021 |
