# Supplementary material for: A significant therapeutic effect of silymarin administered alone, or in combination with chemotherapy, in experimental pulmonary tuberculosis caused by drug-sensitive or drug-resistant strains: In vitro and in vivo studies
Source: PubMed Central journal article supplement (PMC6542514; doi:10.1371/journal.pone.0217457), 2019-05-30
Supplement: pone.0217457.s003.pdf [file pone.0217457.s003.pdf]

**S3 Table. Data to determinate the synergistic activity *in vitro* of silymarin (Sm) and silibinin (Sb) with antituberculous drugs.**

|              | Sm 0.5X |      |      | Sb 0.5X |      |       | Non treated |     |     |
|--------------|---------|------|------|---------|------|-------|-------------|-----|-----|
| <b>H37Rv</b> | 0.09    | 0.11 | 0.1  | 0.39    | 0.32 | 0.355 | 1.5         | 1.6 | 1.8 |
| <b>MDR</b>   | 0.13    | 0.14 | 0.16 | 0.49    | 0.52 | 0.51  | 1.1         | 1.3 | 1.2 |

| <b>H37Rv</b> | Ab 0.5X |      |       | Ab 0.5X+Sm |   |   | Ab 0.5X+ Sb |      |      |
|--------------|---------|------|-------|------------|---|---|-------------|------|------|
| Rifampin     | 0.2     | 0.3  | 0.2   | 0          | 0 | 0 | 0.1         | 0    | 0    |
| Pyrazinamide | 0.06    | 0.04 | 0.05  | 0          | 0 | 0 | 0.01        | 0.03 | 0.02 |
| Isoniazid    | 0.04    | 0.03 | 0.035 | 0          | 0 | 0 | 0           | 0    | 0    |

| <b>MDR</b>   | Ab 0.5X |      |       | Ab 0.5X+Sm |       |      | Ab 0.5X+ Sb |      |       |
|--------------|---------|------|-------|------------|-------|------|-------------|------|-------|
| Amikacin     | 0.23    | 0.26 | 0.245 | 0.15       | 0.1   | 0.12 | 0.2         | 0.14 | 0.17  |
| Moxifloxacin | 0.2     | 0.21 | 0.207 | 0.125      | 0.135 | 0.13 | 0.145       | 0.14 | 0.146 |
| Ethionamide  | 0.05    | 0    | 0.05  | 0          | 0     | 0    | 0           | 0    | 0.05  |
