# Supplementary material for: A significant therapeutic effect of silymarin administered alone, or in combination with chemotherapy, in experimental pulmonary tuberculosis caused by drug-sensitive or drug-resistant strains: In vitro and in vivo studies
Source: PubMed Central journal article supplement (PMC6542514; doi:10.1371/journal.pone.0217457), 2019-05-30
Supplement: pone.0217457.s004.pdf [file pone.0217457.s004.pdf]

**S4 Table. Data to determinate the effect of silymarin and silibinin on the bacterial burden in macrophages infected with drug-sensitive or drug-resistant mycobacteria.**

|                | H37Rv |     |     |     |     |      | MDR |     |      |     |     |      |
|----------------|-------|-----|-----|-----|-----|------|-----|-----|------|-----|-----|------|
| Control        | 5.8   | 7   | 6.5 | 6.3 | 6.4 | 6.4  | 7.5 | 7.2 | 6.2  | 6.5 | 5.6 | 6.6  |
| Sm 50 $\mu$ M  | 4     | 4   | 3.6 | 3.8 | 4.2 | 3.92 | 4.8 | 3.1 | 3.7  | 3.8 | 4.1 | 3.9  |
| Sm 100 $\mu$ M | 2.1   | 2   | 2.5 | 2.9 | 3.2 | 2.54 | 2.1 | 2.1 | 1.7  | 2.3 | 2.5 | 2.14 |
| Sb 50 $\mu$ M  | 3.8   | 3   | 3.4 | 3.6 | 2.8 | 3.32 | 5.4 | 5.1 | 5.25 | 4.9 | 3.1 | 4.75 |
| Sb 100 $\mu$ M | 1.4   | 1.1 | 1   | 1.2 | 1   | 1.14 | 3.8 | 3.8 | 3.15 | 3.7 | 2.1 | 3.31 |
