# Supplementary material for: A significant therapeutic effect of silymarin administered alone, or in combination with chemotherapy, in experimental pulmonary tuberculosis caused by drug-sensitive or drug-resistant strains: In vitro and in vivo studies
Source: PubMed Central journal article supplement (PMC6542514; doi:10.1371/journal.pone.0217457), 2019-05-30
Supplement: pone.0217457.s005.pdf [file pone.0217457.s005.pdf]

**S5 Table. Dates to evaluate the role of silymarin as an adjunct to conventional chemotherapy in mice infected with a drug-sensitive *M. tuberculosis* strain**

| Day | CFU counts |    |    |    |    |    |    |    |    |    |    |    |    |    |     |    |    |   |   |   |   |   |   |   |         |   |   |   |   |   |   |   |
|-----|------------|----|----|----|----|----|----|----|----|----|----|----|----|----|-----|----|----|---|---|---|---|---|---|---|---------|---|---|---|---|---|---|---|
|     | Vh         |    |    |    |    |    |    |    | Sm |    |    |    |    |    |     |    | Ab |   |   |   |   |   |   |   | Ab + Sm |   |   |   |   |   |   |   |
| 7   | 13         | 22 | 11 | 12 | 11 | 12 | 11 | 21 | 10 | 17 | 6  | 10 | 6  | 10 | 6.1 | 6  | 3  | 2 | 1 | 1 | 1 | 2 | 4 | 2 | 2       | 2 | 4 | 3 | 4 | 3 | 3 | 3 |
| 14  | 13         | 23 | 36 | 28 | 27 | 38 | 16 | 21 | 13 | 11 | 20 | 18 | 14 | 12 | 17  | 21 | 2  | 2 | 2 | 3 | 2 | 2 | 3 | 3 | 1       | 1 | 0 | 0 | 0 | 0 | 0 | 0 |
| 28  | 24         | 25 | 30 | 26 | 31 | 29 | 28 | 19 | 18 | 17 | 20 | 18 | 19 | 18 | 16  | 17 | 1  | 1 | 0 | 0 | 2 | 1 | 2 | 1 | 0       | 0 | 1 | 1 | 1 | 1 | 0 | 0 |
| 60  | 21         | 21 | 20 | 19 | 29 | 23 | 26 | 22 | 17 | 19 | 12 | 16 | 17 | 12 | 15  | 21 | 0  | 0 | 0 | 0 | 1 | 1 | 0 | 0 | 0       | 0 | 0 | 0 | 1 | 1 | 0 | 0 |

| Cytokine mRNA expression/ 10 <sup>6</sup> rplpo mRNA copies |    |   |   |    |    |    |       |    |    |    |    |    |
|-------------------------------------------------------------|----|---|---|----|----|----|-------|----|----|----|----|----|
| IL-12                                                       |    |   |   |    |    |    |       |    |    |    |    |    |
| Day                                                         | Vh |   |   | Ab |    |    | Ab/Sm |    |    | Sm |    |    |
| 7                                                           | 6  | 8 | 7 | 8  | 9  | 9  | 9     | 3  | 6  | 0  | 0  | 0  |
| 14                                                          | 5  | 3 | 4 | 3  | 2  | 3  | 5     | 42 | 23 | 0  | 0  | 0  |
| 30                                                          | 4  | 5 | 5 | 7  | 6  | 6  | 29    | 46 | 37 | 12 | 13 | 13 |
| 60                                                          | 2  | 3 | 3 | 8  | 14 | 11 | 25    | 41 | 33 | 16 | 13 | 15 |
| IFN- $\gamma$                                               |    |   |   |    |    |    |       |    |    |    |    |    |
| 7                                                           | 0  | 0 | 0 | 0  | 0  | 0  | 0     | 0  | 0  | 0  | 0  | 0  |
| 14                                                          | 0  | 0 | 0 | 1  | 0  | 0  | 0     | 0  | 1  | 0  | 0  | 0  |
| 30                                                          | 0  | 0 | 0 | 1  | 1  | 1  | 0     | 1  | 1  | 1  | 1  | 1  |
| 60                                                          | 0  | 0 | 0 | 0  | 1  | 1  | 1     | 1  | 0  | 1  | 1  | 0  |
| TNF $\alpha$                                                |    |   |   |    |    |    |       |    |    |    |    |    |
| 7                                                           | 0  | 0 | 0 | 0  | 0  | 0  | 0     | 0  | 0  | 0  | 0  | 0  |
| 14                                                          | 0  | 0 | 0 | 0  | 0  | 0  | 0     | 0  | 1  | 0  | 0  | 0  |
| 30                                                          | 8  | 0 | 0 | 0  | 18 | 0  | 5     | 2  | 13 | 0  | 0  | 0  |
| 60                                                          | 0  | 0 | 0 | 0  | 0  | 0  | 0     | 0  | 0  | 0  | 0  | 0  |

| % Pneumonia |    |    |    |    |    |    |    |    |    |       |    |    |
|-------------|----|----|----|----|----|----|----|----|----|-------|----|----|
| Day         | Vh |    |    | Sm |    |    | Ab |    |    | Ab/Sm |    |    |
| 30          | 95 | 91 | 92 | 64 | 80 | 41 | 50 | 60 | 54 | 42    | 49 | 37 |
| 60          | 95 | 92 | 84 | 86 | 63 | 88 | 50 | 49 | 47 | 11    | 11 | 13 |
